# Supplementary material for: Characterising water vapour concentration dependence of commercial cavity ring-down spectrometers for continuous onsite atmospheric water vapour isotope measurements in the tropics
Source: Copernicus journal article supplement (doi:10.5194/amt-2020-305), 2020-09-02
Supplement: Supplementary file 1 [file amt-2020-305-supplement.pdf]

## S1 IRMS methodology

The  $\delta^2\text{H}$  and  $\delta^{18}\text{O}$  measurements were done on a Delta<sup>+</sup>XL isotope ratio mass spectrometer coupled to a high-temperature conversion reactor (HTC) via a ConFloIII. The analysis method is described in Gehre et al. (2004). A daily sequence consisted of the DI1 or DI2 water samples, an in-house reference standard www-j1 (Willi Working Water-Jena1;  $\delta^2\text{H}$ :  $-66.45 \pm 1.0$  ‰,  $\delta^{18}\text{O}$ :  $-9.78 \pm 0.10$  ‰), an in-house scaling standard BGP-j1 (Brand Greenland Precipitation-Jena1;  $\delta^2\text{H}$ :  $-187.94 \pm 1.0$  ‰,  $\delta^{18}\text{O}$ :  $-24.46 \pm 0.10$  ‰), and an in-house quality control RWB-j1 (ReinstWasser Brand-Jena1;  $\delta^2\text{H}$ :  $-1 \pm 1.0$  ‰,  $\delta^{18}\text{O}$ :  $7.8 \pm 0.10$  ‰). The daily average standard deviation of www-j1 was better than 0.16 ‰ (n = 44) for  $\delta^{18}\text{O}$ , and better than 0.7 ‰ (n = 41) for  $\delta^2\text{H}$  measurements. All in-house standards are regularly calibrated and checked against the international IAEA standards VSMOW2 and SLAP2. Thus the DI1 and DI2 isotope values are given on the VSMOW/SLAP scale.

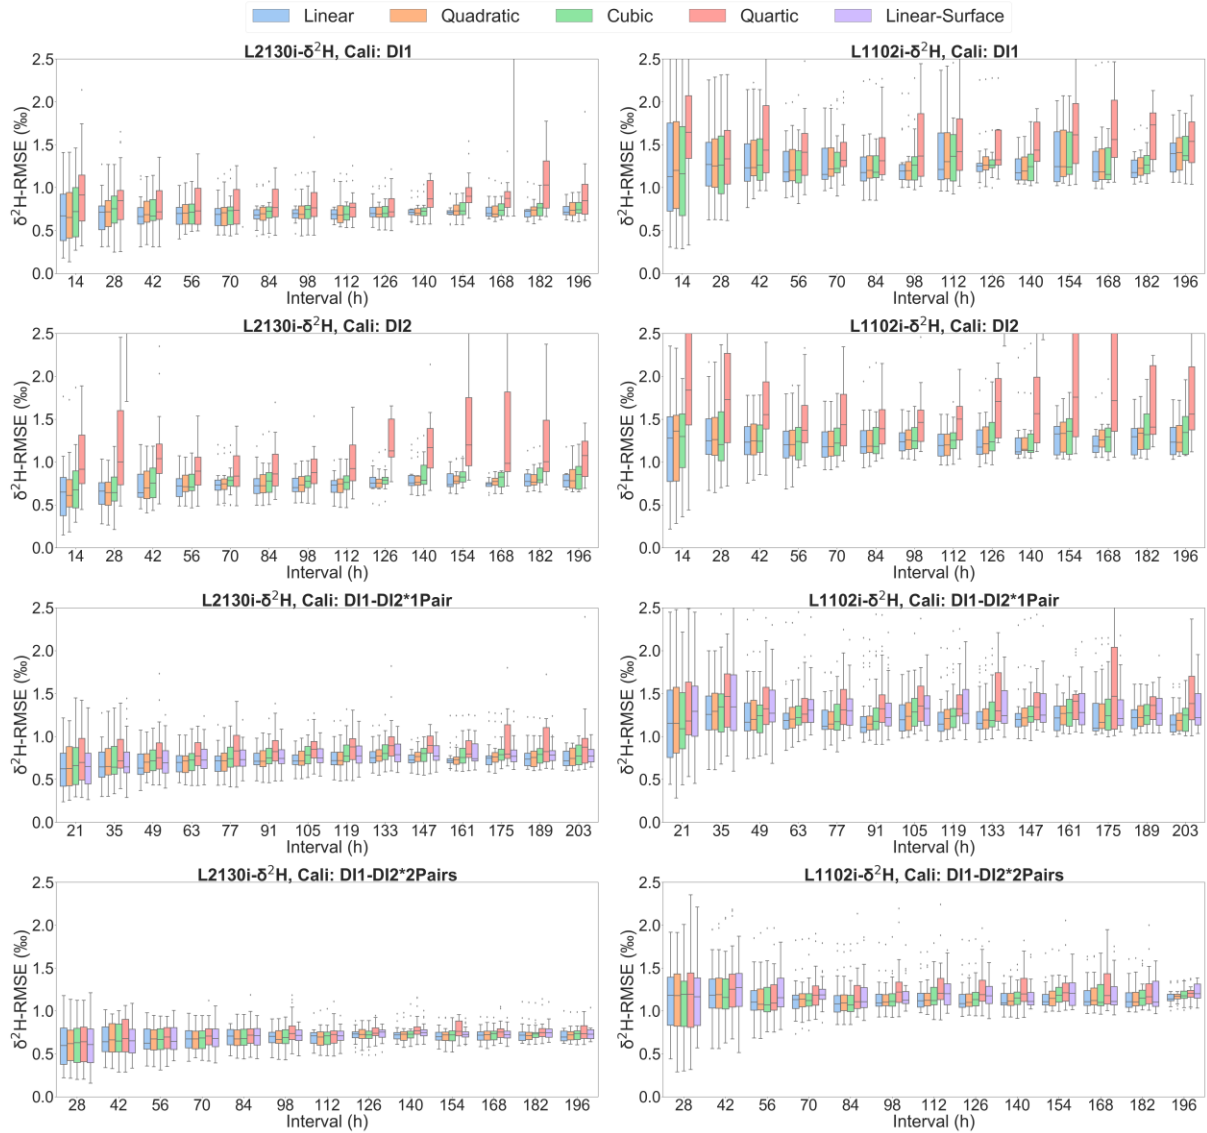

*Figure S1* Boxplots of root mean square error (RMSE) of  $\delta^{18}\text{O}$ , derived from calibrating  $[\text{H}_2\text{O}]$ -dependence of  $\delta^2\text{H}$  measurements by each of five fitting methods (i.e., linear, quadratic, cubic, quartic, linear surface fitting methods) for each of four calibration strategies: DI1, DI2, DI1-DI2\*1Pair, DI1-DI2\*2Pairs. The left-hand figures present boxplots of RMSE of  $\delta^2\text{H}$  measurements by the L2130i, depending on interval length (i.e., the time period used for calibrating  $[\text{H}_2\text{O}]$ -dependence). The right-hand figures display boxplots of RMSE of  $\delta^{18}\text{O}$  measurements by the L1102i, depending on interval length. The procedure for assessing  $[\text{H}_2\text{O}]$ -dependence uncertainties (= RMSE) is described in section 2.3.

## References

Gehre, M., Geilmann, H., Richter, J., Werner, R. A. and Brand, W. A.: Continuous flow  $^2\text{H}/^1\text{H}$  and  $^{18}\text{O}/^{16}\text{O}$  analysis of water samples with dual inlet precision, *Rapid Communications in Mass Spectrometry*, 18(22), 2650–2660, doi:10.1002/rcm.1672, 2004.
